# Supplementary material for: A photoelectrochemical glucose sensor based on gold nanoparticles as a mimic enzyme of glucose oxidase
Source: Royal Society of Chemistry journal article supplement (doi:10.1039/c9ra02088h), 2019-01-01
Supplement: c9ra02088h1.pdf [file c9ra02088h1.pdf]

## A photoelectrochemical glucose sensor based on gold nanoparticles as mimic enzyme of glucose oxidase

Ling Cao<sup>[a]</sup>, Panpan Wang, Li Chen, Ying Wu, Junwei Di<sup>\*[a]</sup>

*College of Chemistry, Chemical Engineering and Material Science, Soochow University, Suzhou, 215123, PR China.*

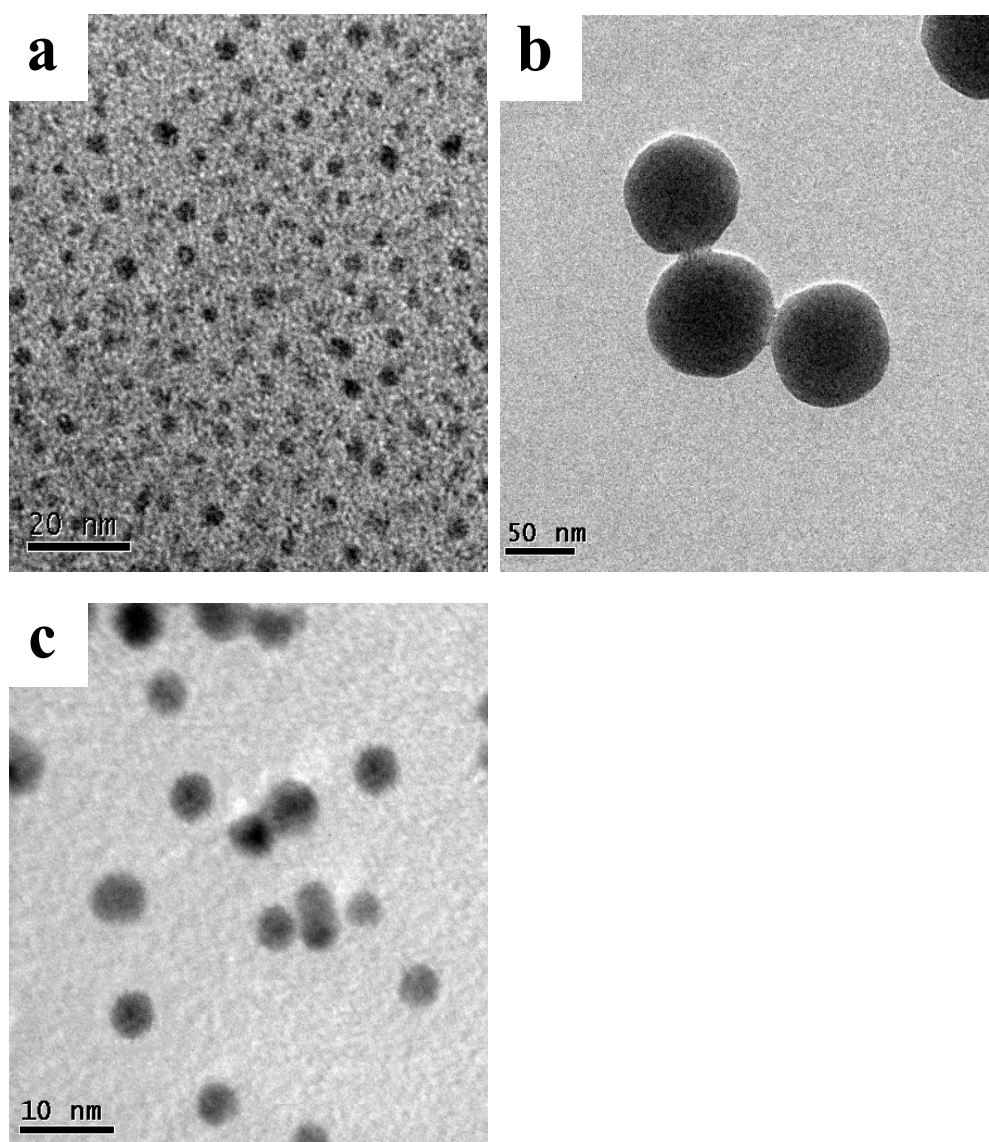

Figure S1. TEM of the as-synthesized PbS QDs (a), thiol-modified SiO<sub>2</sub> (b) and Au nanoparticles (c).

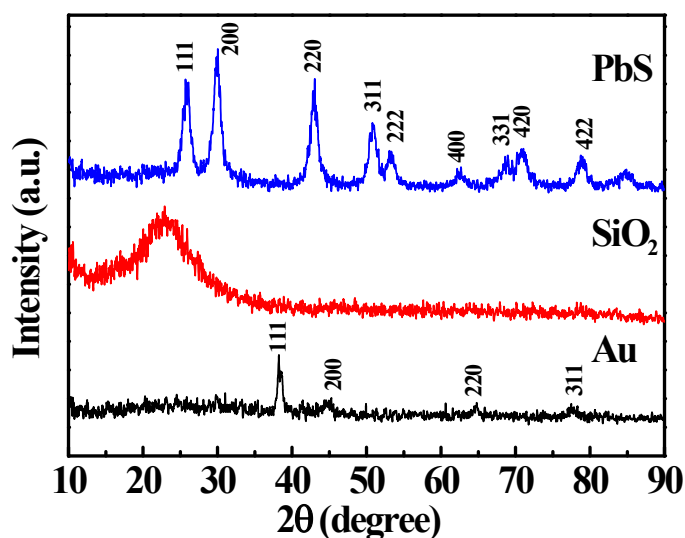

Figure S2. XRD patterns of the as-fabricated PbS QDs, thiol-modified SiO<sub>2</sub> and Au nanoparticles.

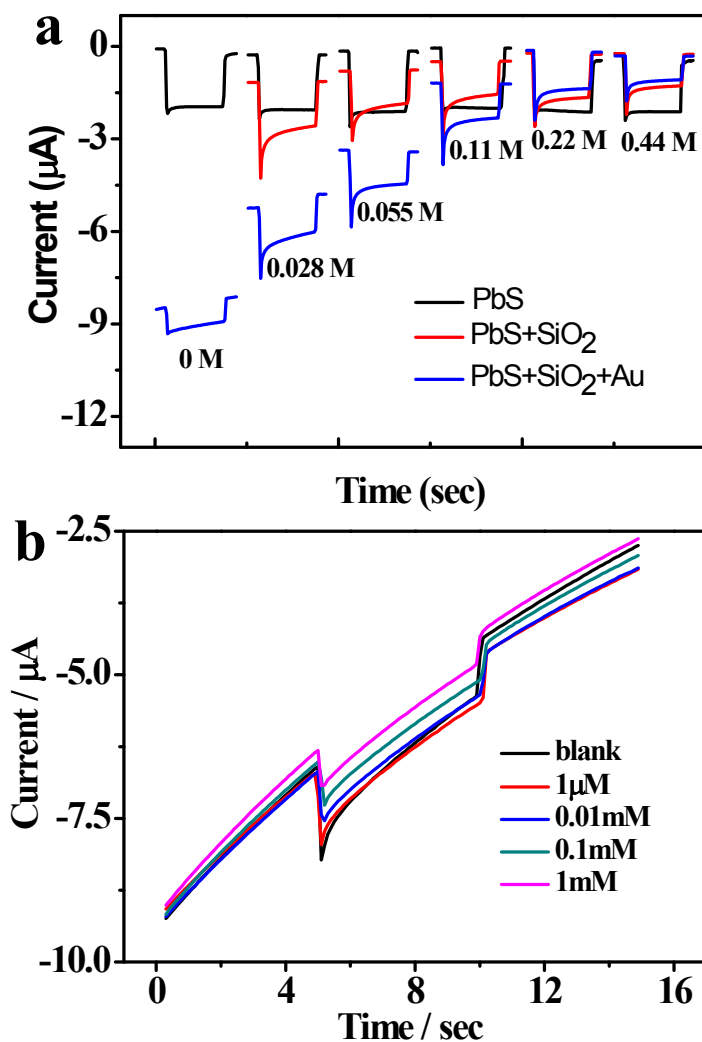

Figure S3. Photocurrent responses of ITO/PbS, ITO/PbS/SiO<sub>2</sub>, and ITO/PbS/SiO<sub>2</sub>/AuNPs electrodes in pH 7.4 buffer solution at applied potential of -0.2V (a); Detection of glucose without SiO<sub>2</sub> layer (b).

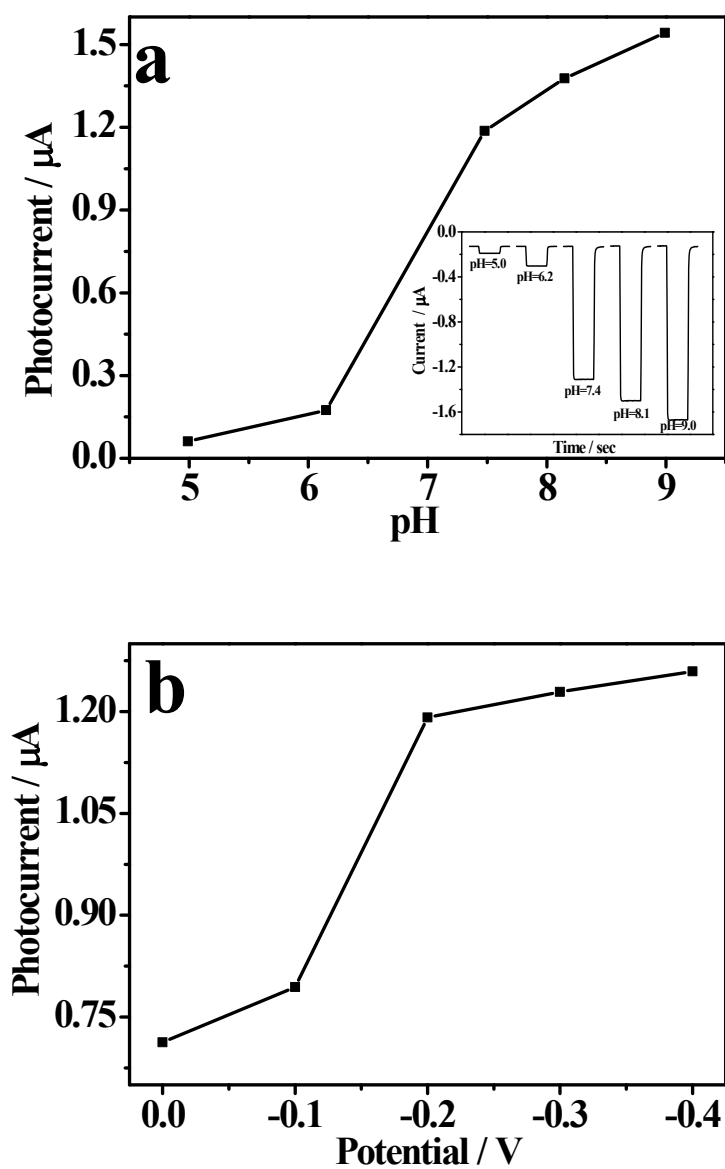

Figure S4. Effect of pH (a) value of buffer solution with 0.1 mM glucose (the insert Fig is the currents in different pH value), and the applied voltage (b) on the ITO/PbS/SiO<sub>2</sub>/AuNPs electrode.

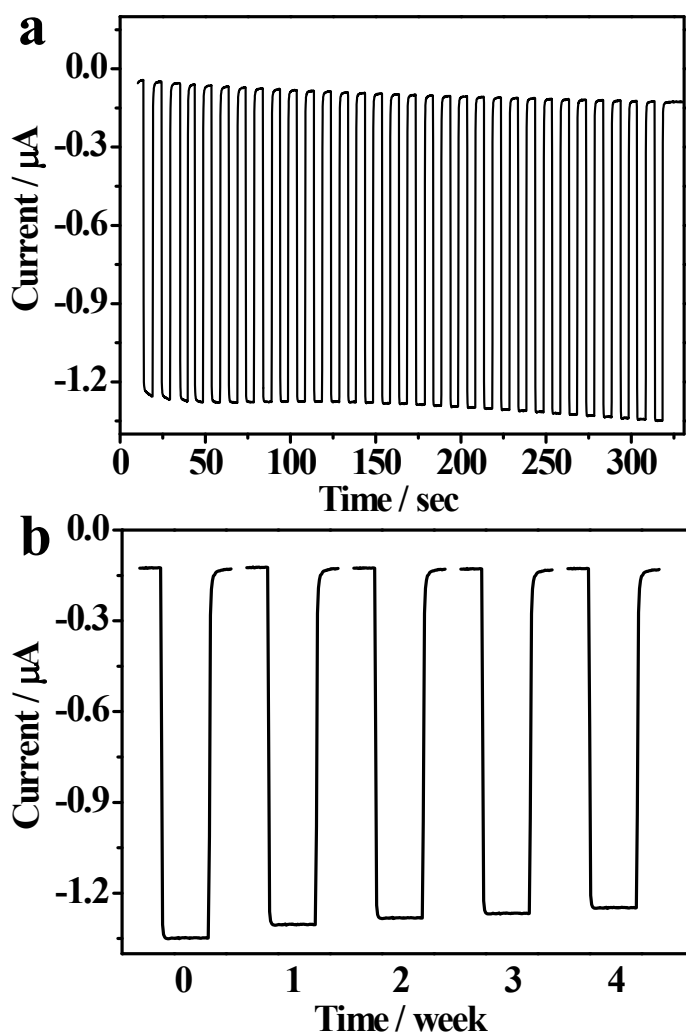

Figure S5. Time-based photocurrent response of the ITO/PbS/SiO<sub>2</sub>/AuNPs electrode by repeated on/off illumination cycles (a); The storage stability of the ITO/PbS/SiO<sub>2</sub>/AuNPs electrode (b).

Table S1. Detection of glucose in human serum (N=3)

| Sample | Detected<br>/μM | Added<br>/μM | Founded<br>/μM | Recovery<br>/% | This method<br>/mM | RSD<br>/% | Hospital method<br>/mM |
|--------|-----------------|--------------|----------------|----------------|--------------------|-----------|------------------------|
| 1      | 52.0            | 50           | 103.5          | 103.0          | 5.20               | 1.7       | 5.32                   |
| 2      | 56.3            | 50           | 104.3          | 96.0           | 5.63               | 2.3       | 5.74                   |
| 3      | 59.2            | 50           | 108.2          | 98.0           | 5.92               | 1.2       | 5.93                   |
| 4      | 29.4            | 25           | 53.2           | 97.8           | 2.94               | 1.8       | 2.92                   |
| 5      | 92.0            | 100          | 192.6          | 100.3          | 9.20               | 1.4       | 9.25                   |
